# Supplementary material for: Molten ionic oxides for CO2 capture at medium to high temperatures
Source: Royal Society of Chemistry journal article supplement (doi:10.1039/c9ta09122j), 2019-01-01
Supplement: c9ta09122j1.pdf [file c9ta09122j1.pdf]

## Supporting Information

### Molten ionic oxides for CO<sub>2</sub> capture at medium to high temperatures

*Takuya Harada,<sup>a</sup> Cameron Halliday,<sup>a</sup> Aqil Jamal,<sup>b</sup> and T. Alan Hatton<sup>a\*</sup>*

*a) Department of Chemical Engineering, Massachusetts Institute of Technology, 77 Massachusetts Avenue,  
Cambridge, MA 02139. United States*

*b) Research & Development Centre, Saudi Aramco, Dhahran 31311, Kingdom of Saudi Arabia*

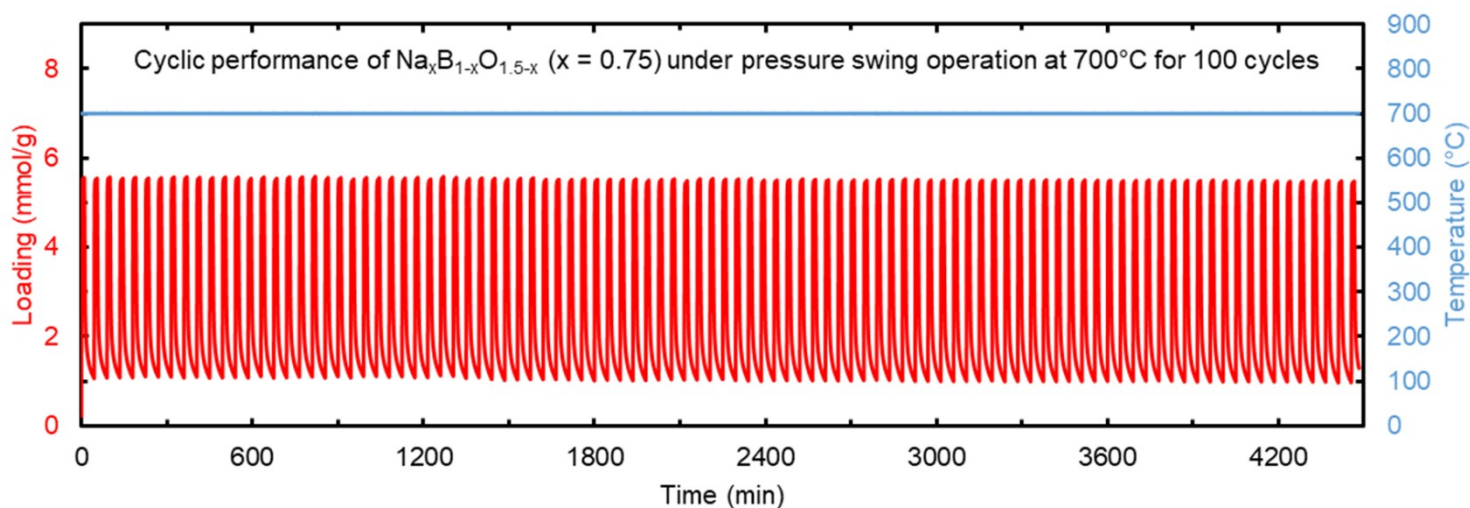

Figure S1. Cyclic regenerability of CO<sub>2</sub> uptake and the desorption by Na<sub>x</sub>B<sub>1-x</sub>O<sub>y</sub> (x=0.75) up to 100 cycles by pressure swing operation on repeated switching of the gas stream between 100% CO<sub>2</sub> (pCO<sub>2</sub> = 1 bar) and 100% N<sub>2</sub> (pCO<sub>2</sub> = 0 bar) at 700°C.
